# Supplementary material for: A universal growth method for high-quality phase-engineered germanium chalcogenide nanosheets
Source: Royal Society of Chemistry journal article supplement (doi:10.1039/d2nr05657g), 2023-01-01
Supplement: d2nr05657g1.pdf [file d2nr05657g1.pdf]

Supporting Information for

A Universal Growth Method for High Quality Phase-Engineered Germanium Chalcogenide Nanosheets

Junyu Qu<sup>a,b,†</sup>, Chenxi Liu<sup>a,b,†</sup>, Muhammad Zubair<sup>a,b,†</sup>, Zhouxiaosong Zeng<sup>b</sup>, Bo Liu<sup>a,b</sup>, Xin Yang<sup>a,b</sup>, Ziyu Luo<sup>a,b</sup>, Xiao Yi<sup>a,b</sup>, Ying Chen<sup>a,b</sup>, Shula Chen<sup>a,b,‡</sup>, and Anlian Pan<sup>a,b,‡</sup>.

**AFFILIATIONS**

<sup>1</sup>Key Laboratory for Micro-Nano Physics and Technology of Hunan Province, College of Materials Science and Engineering, Hunan University, Changsha, Hunan 410082, P.R. China

<sup>2</sup>Hunan Institute of Optoelectronic Integration, Hunan University, Changsha, 410082, China

‡.Authors to whom correspondence should be addressed: shuch@hnu.edu.cn and anlian.pan@hnu.edu.cn.

† These authors contributed equally to this work

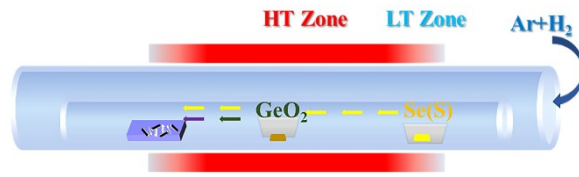

**Fig. S1.** Schematic diagram of the experimental setup and the controllable growth process of Germanium chalcogenide.

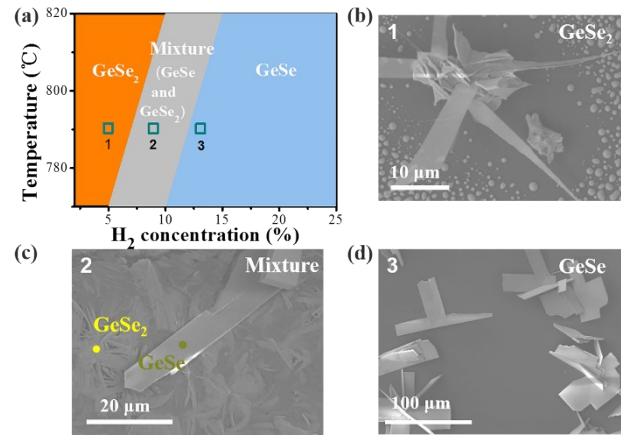

**Fig. S2.** (a) Phase diagram for the growth of GeSe and GeSe<sub>2</sub>. (b-d) Typical growth results under the growth conditions marked with 1, 2 and 3 in (a), respectively

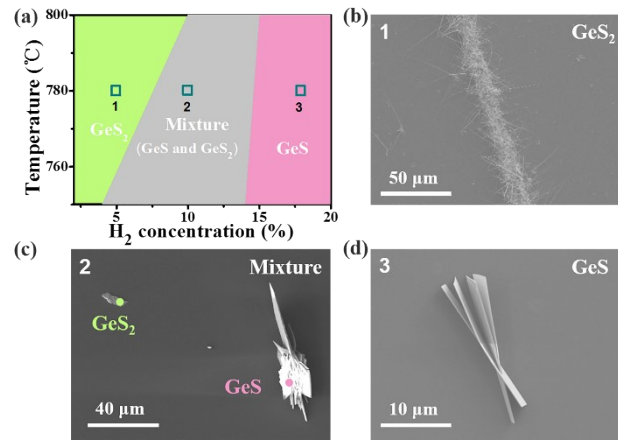

**Fig. S3.** (a) Phase diagram for the growth of GeS and GeS<sub>2</sub>. (b-d) Typical growth results under the growth conditions marked with 1, 2 and 3 in (a), respectively

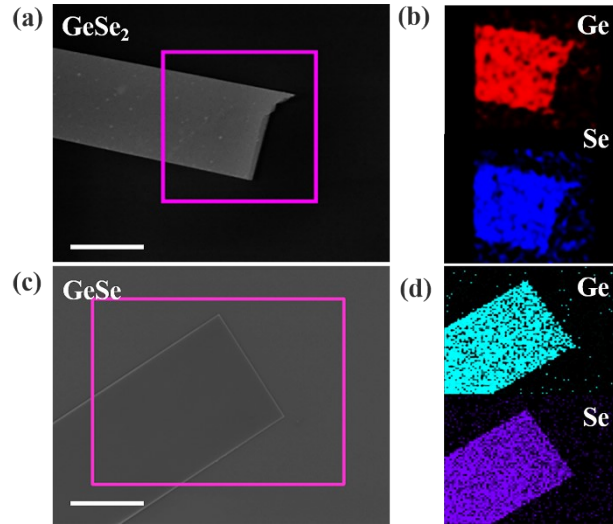

**Fig. S4.** SEM images and the element mapping of GeSe and GeSe<sub>2</sub>. (a) SEM image of GeSe<sub>2</sub>. Scale bar is 5  $\mu\text{m}$ . (b) elemental mapping in the pink rectangle region of the GeSe<sub>2</sub>. (c) SEM image of GeSe. Scale bar is 5  $\mu\text{m}$ . (d) elemental mapping in the pink rectangle region of the GeSe.

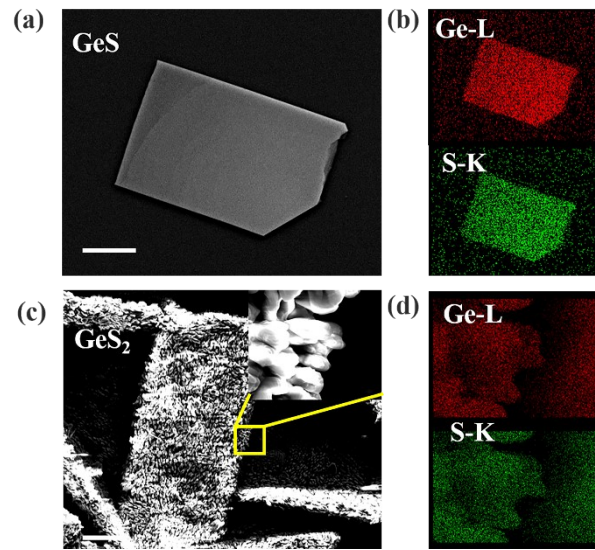

**Fig. S5.** SEM images and the element mapping of GeSe and GeSe<sub>2</sub>. (a) SEM image of GeSe<sub>2</sub>. Scale bar is 5  $\mu\text{m}$ . (b) elemental mapping in the pink rectangle region of the GeSe<sub>2</sub>. (c) SEM image of GeSe. Scale bar is 5  $\mu\text{m}$ . (d) elemental mapping in the pink rectangle region of the GeSe images and the element mapping of GeSe and GeSe<sub>2</sub>.

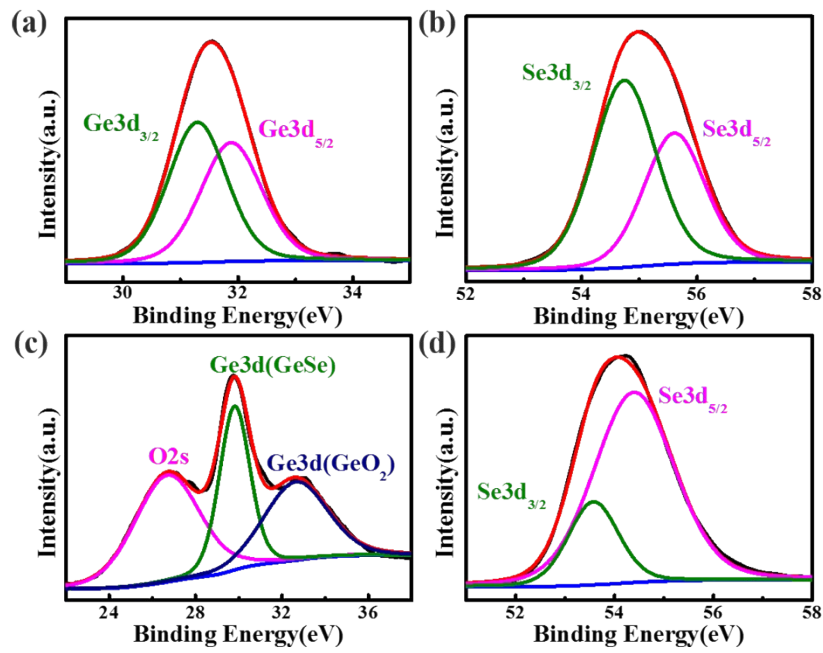

**Fig. S6.** XPS spectra of GeSe<sub>2</sub> (a,b) and GeSe (c,d). The core line signals of Ge 3d and Se 3d located at 31.5 eV and 55.0 eV for GeSe<sub>2</sub>, while they are situated at 30.0 eV (Ge 3d) and 54.1 eV (Se 3d) for GeSe.

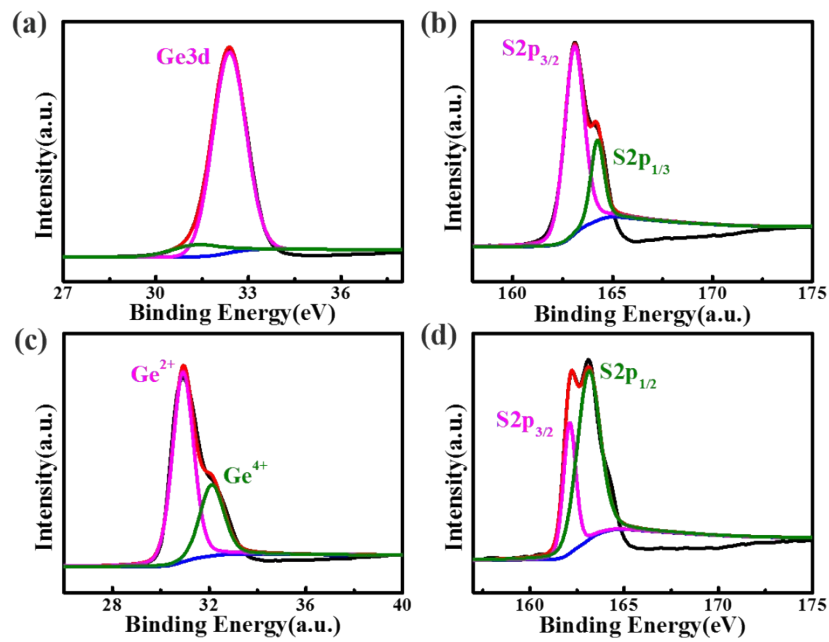

**Fig. S7.** XPS spectra of GeS<sub>2</sub> (a,b) and GeS (c,d). There are peaks of GeS<sub>2</sub> located at 32.3 eV (Ge 3d, GeS<sub>2</sub>), 163.1 eV (S p<sub>3/2</sub>, GeS<sub>2</sub>) and 164.2 eV (S 2p<sub>1/3</sub>, GeS<sub>2</sub>) in Fig. S7(a) and S7(b). Figure S7(c) and S7(d) show the binding energy of Ge<sup>2+</sup> (30.9 eV), Ge<sup>4+</sup> (32.1 eV), S 2p<sub>3/2</sub> (162.1 eV) and S 2p<sub>1/2</sub> (163.1 eV) in GeS.



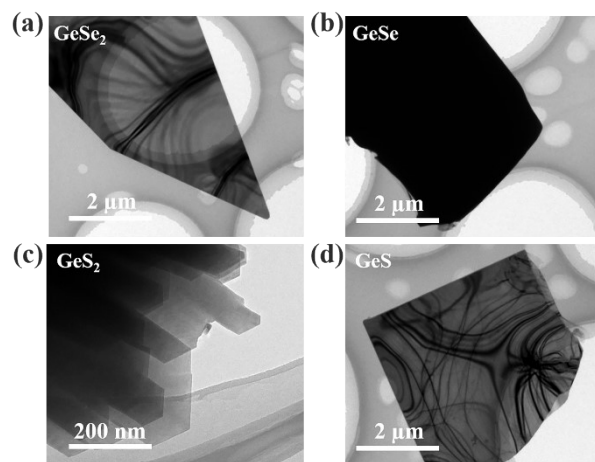

**Fig. S8.** Low-magnification TEM image of GeSe<sub>2</sub>(a), GeSe(b), GeS<sub>2</sub>(c) and GeS(d).

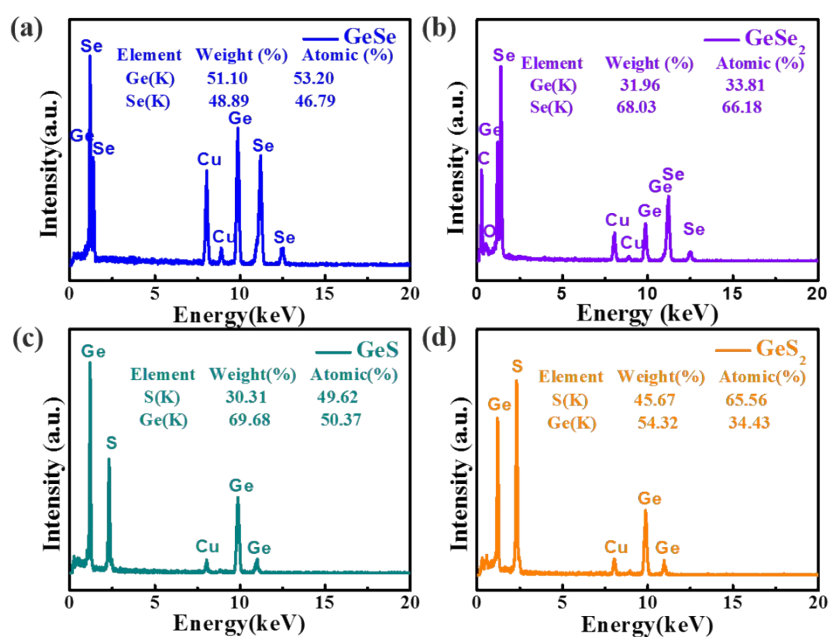

**Fig. S9.** EDS spectra of GeSe(a), GeSe<sub>2</sub>(b), GeS(c) and GeS<sub>2</sub>(d). The EDS spectrum of GeSe (a) shows that the Ge/Se ratio is ~1:1. The EDS spectrum of GeSe<sub>2</sub> (b) shows that the Ge/Se ratio is ~1:2. The EDS spectrum of GeS (c) shows that the Ge/S ratio is ~1:2. The EDS spectrum of GeS<sub>2</sub> (d) shows that the Ge/S ratio is ~1:2.

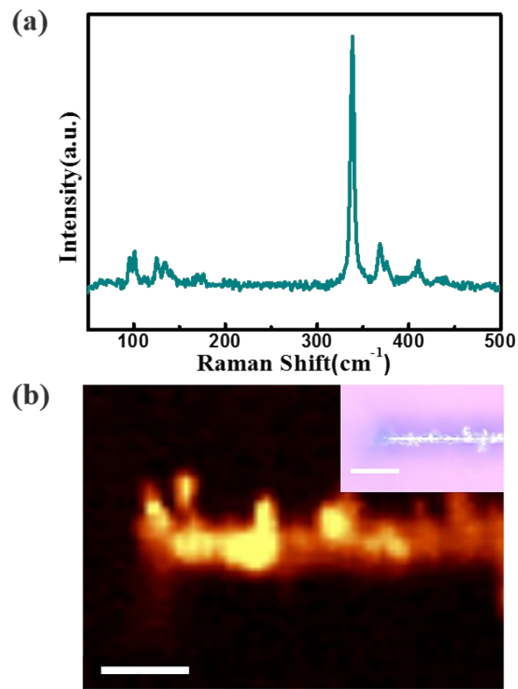

**Fig. S10.** Raman feature of GeS<sub>2</sub>. (a) Raman spectrum of GeS<sub>2</sub>. (b) Raman mapping of GeS<sub>2</sub>. The inset is the corresponding optical image. Scale bar is 5  $\mu\text{m}$ .

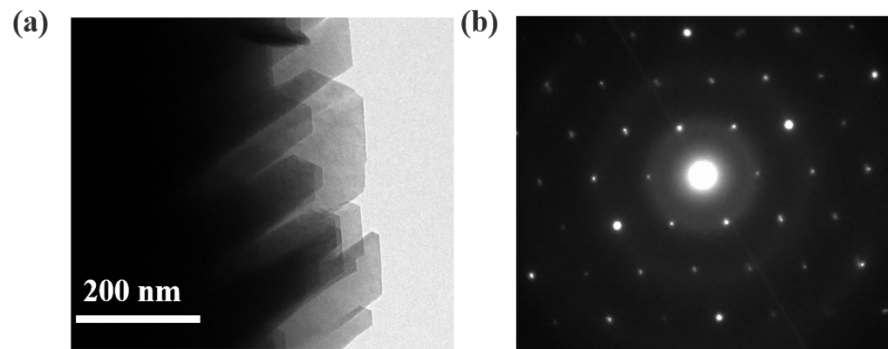

**Fig. S11.** Low-magnification TEM image of GeS<sub>2</sub>(a) and the corresponding selected area electron diffraction pattern(b). Because of the instability of the grown GeS<sub>2</sub> under high energy electron beam, the high-resolution TEM image is unavailable.

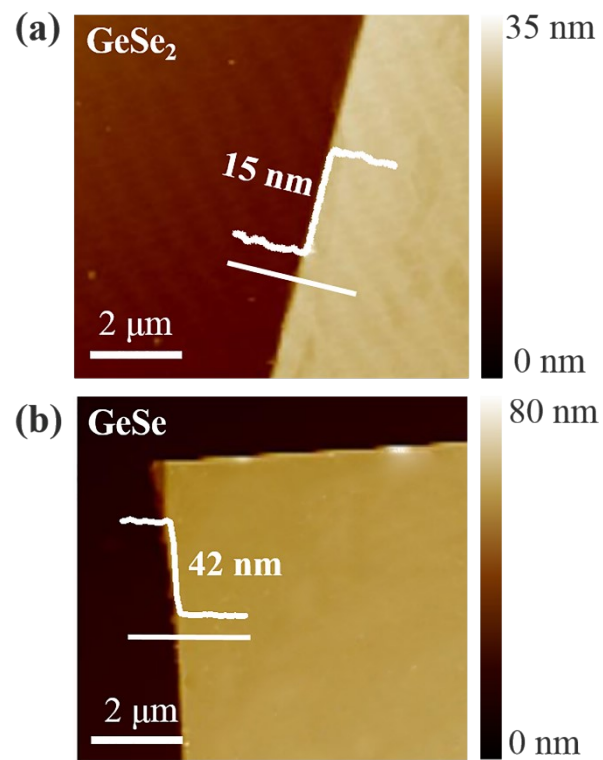

**Fig. S12.** AFM image of GeSe and GeSe<sub>2</sub>. (a)AFM image of GeSe<sub>2</sub>. (b)AFM image of GeSe.

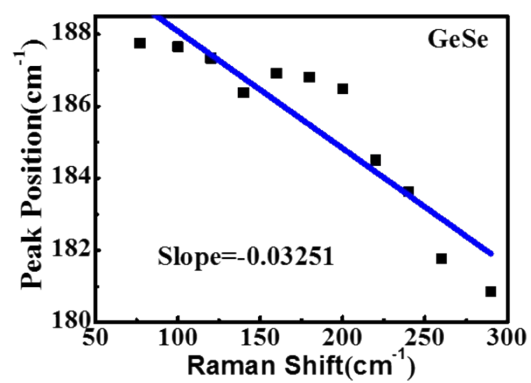

**Fig. S13.** Temperature-dependence of the phonon peak position of the  $A_g^3$  mode at  $150\text{ cm}^{-1}$  of GeSe nanobelt.

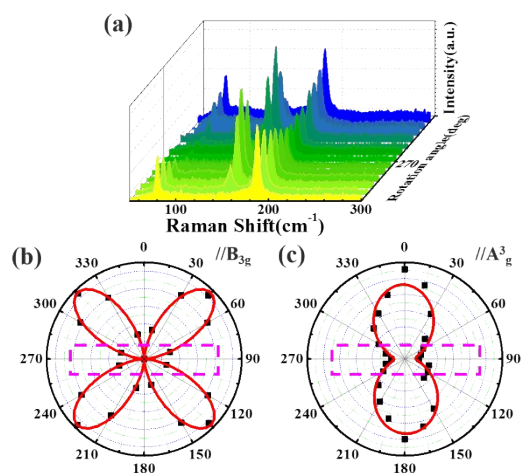

**Fig. S14.** (a) Angle - dependent Raman spectra of GeSe at angle ranging from 180° to 360°. (b) Angle-resolved Raman scattering intensities of B<sub>3g</sub> modes under parallel configuration. (c) Angle-resolved Raman scattering intensities of A<sub>3g</sub> modes under parallel configuration.

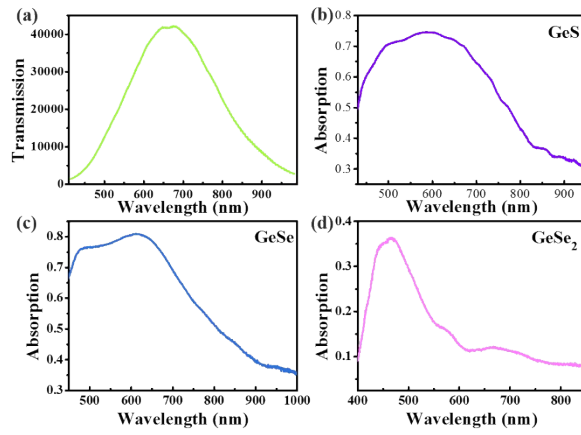

**Fig. S15.** The absorption measurements of the grown germanium chalcogenide nanosheets. (a) The transmission of the transparent glass sheet. (b-d) The absorption spectra of GeS (b), GeSe (c) and GeSe<sub>2</sub> (d)



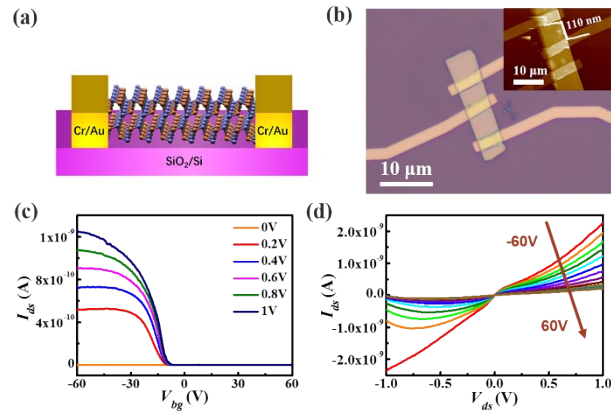

**Fig. S16.** (a) Schematic structure of the GeS photodetector. (b) Optical image of the device. Upper right is the corresponding AFM image, scale bar is 20  $\mu\text{m}$ . (c)  $I_{ds}$ - $V_{bg}$  transfer curves at various  $V_{ds}$  values. (d)  $I_{ds}$ - $V_{ds}$  output characteristics of the device at gate voltage varying from -60 to 60 V.

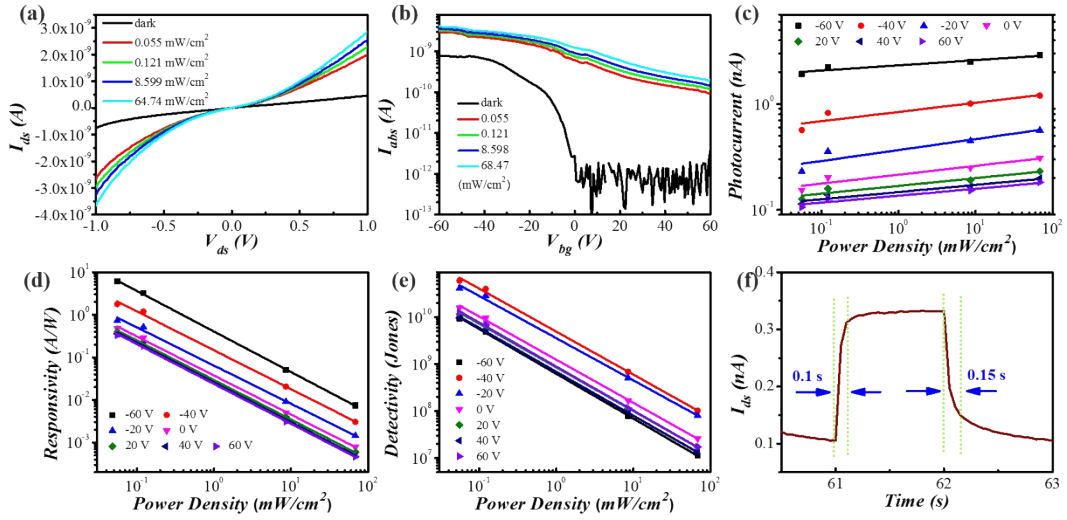

**Fig. S17.** Optoelectronic characteristics of GeS-based device. (a) Output curves of GeS under different 520 nm irradiation intensities at  $V_{bg} = -60$  V. (b) Transfer curves in the dark and under diverse 520 nm laser intensities at  $V_{ds} = 1$  V. (c-d) Irradiation power dependence of photocurrent (c), photoresponsivity (d) and detectivity (e) of GeS at  $V_{ds} = 1$  V. (f) The on/off switching of the GeS. The calculated photoresponsivity and dectectivity of GeS are  $0.005 \text{ cm}^2\text{V}^{-1}\text{s}^{-1}$ ,  $6.1 \text{ A/W}$  and  $9.3 \times 10^9 \text{ Jones}$ .

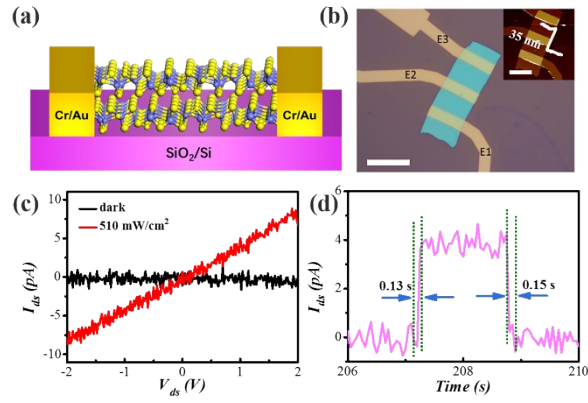

**Fig. S18.** Optoelectronic characteristics of GeSe<sub>2</sub>-based device. (a) Schematic structure of the GeSe<sub>2</sub> photodetector. (b) Optical image of the device. Upper right is the corresponding AFM image, scale bar is 20  $\mu\text{m}$ . (c) I-V curves of GeSe<sub>2</sub> under dark and 405 nm irradiation. (d) The on/off switching of the GeSe<sub>2</sub>. The calculated photoresponsivity and detectivity of GeSe<sub>2</sub> are  $1.5 \times 10^{-6}$  A/W and  $6.2 \times 10^4$  Jones.

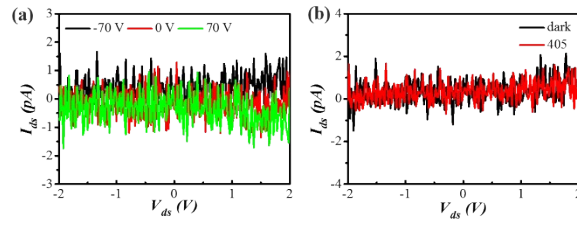

**Fig. S19.** Optoelectronic characteristics of GeS<sub>2</sub>-based device. (a) Output curves of GeS<sub>2</sub> under various gate voltages. (b) I-V curves of GeS<sub>2</sub> under dark and 405 nm irradiation.

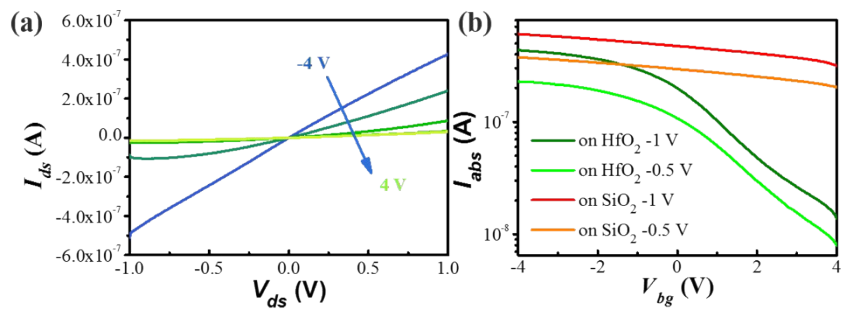

**Fig. S20.** (a) Output curves of GeSe on HfO<sub>2</sub>/Si and SiO<sub>2</sub>/Si substrate. (b) Transfer curves of GeSe on HfO<sub>2</sub>/Si and SiO<sub>2</sub>/Si substrate.

**Table. S1.** Comparison of grown GeSe-based photodetector performance with other reported 2D semiconductors prepared by CVD

| Material                             | Fabrication Method | Spectral region | Responsivity<br>[A W <sup>-1</sup> ] | Detectivity<br>[Jones] | Rise time<br>[ms] | Ref       |
|--------------------------------------|--------------------|-----------------|--------------------------------------|------------------------|-------------------|-----------|
| SnSe <sub>2</sub>                    | CVD                | NIR             | 1.9                                  | -                      | -                 | 22        |
| SnS <sub>2</sub>                     | CVD                | visible         | 261                                  | $1.9 \times 10^{10}$   | 20                | 46        |
| MoS <sub>2</sub>                     | CVD                | visible         | 0.057                                | $10^{10}$              | 0.07              | 51        |
| MoSe <sub>2</sub>                    | CVD                | visible         | 93.7                                 | -                      | 400               | 53        |
| WS <sub>2</sub>                      | CVD                | visible         | $9.2 \times 10^{-5}$                 | -                      | 5.3               | 54        |
| ReS <sub>2</sub>                     | CVD                | visible         | 16.14                                | -                      | 105               | 55        |
| GaTe                                 | CVD                | UV-visible      | 0.03                                 | -                      | 54                | 56        |
| HfS <sub>2</sub>                     | CVD                | UV-visible      | $2.8 \times 10^3$                    | -                      | 55                | 49        |
| HfS <sub>3</sub>                     | CVD                | visible         | 0.11                                 | -                      | <400              | 57        |
| ZrS <sub>3</sub>                     | CVD                | visible         | 0.53                                 | -                      | <400              | 57        |
| In <sub>2</sub> Se <sub>3</sub>      | CVD                | visible         | 578                                  | $6 \times 10^{12}$     | 20                | 52        |
| ReS <sub>2(1-x)Se<sub>2x</sub></sub> | CVD                | Visible-NIR     | 0.25                                 | -                      | 15                | 50        |
| GeSe                                 | CVD                | visible         | $9.3 \times 10^3$                    | -                      | 48                | 23        |
| GeSe                                 | CVD                | visible         | $1.16 \times 10^5$                   | $9.82 \times 10^{12}$  | 11                | This work |
